# Supplementary material
Source: PubMed Central journal article supplement (PMC3036743)
Supplement: NIHMS267638-supplement-Supplementary_Figures.pdf [file NIHMS267638-supplement-Supplementary_Figures.pdf]

Supplemental Figure. 1. Summary of synaptology of  $\alpha$ - and  $\gamma$ -MNs in intact, ST-Non-Tr and ST-Tr rats. Diagrams were constructed based on the average MN size, percent coverage and number of each bouton type, and the average mean diameter of  $\alpha$ - and  $\gamma$ -MNs. Pie diagrams illustrate the proportion of the total number of boutons associated with each synaptic type for  $\alpha$ - and  $\gamma$ -MNs of all groups.

A

alpha-MN

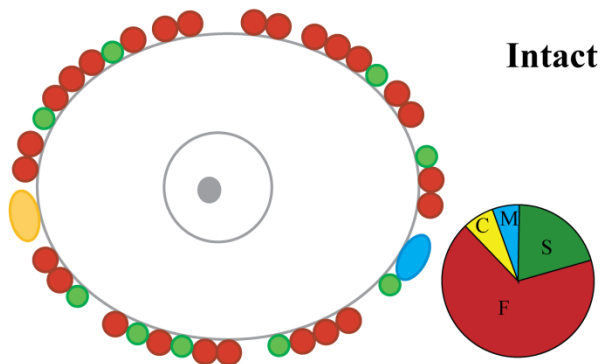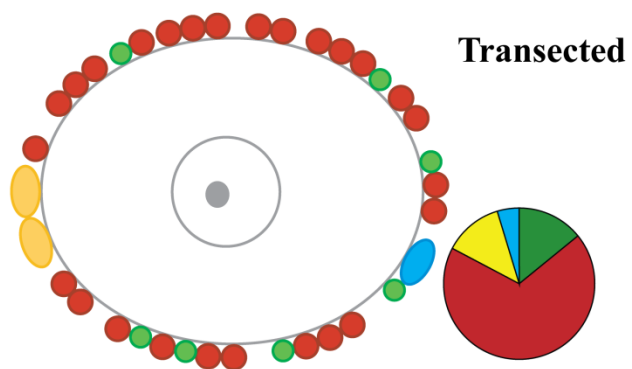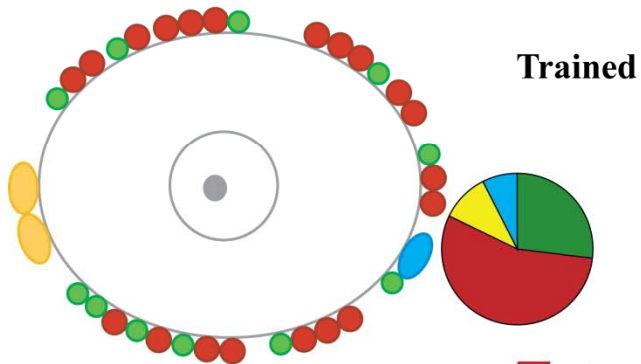

B

gamma-MN

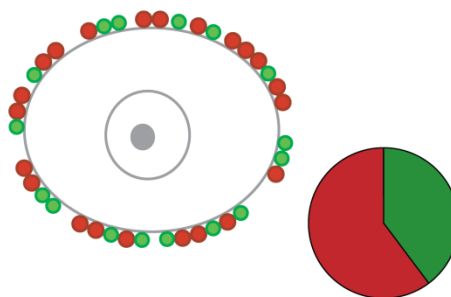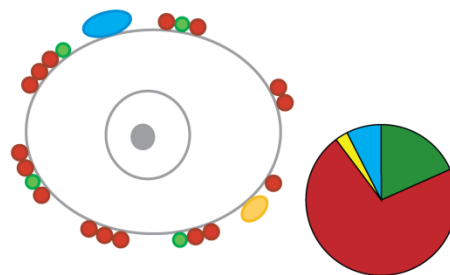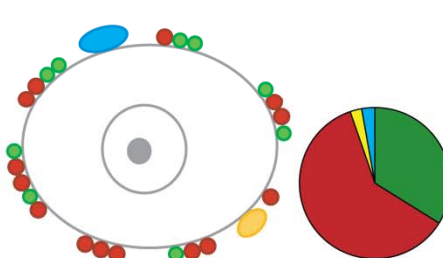

F-bouton S-bouton C-bouton M-bouton
